# Supplementary material for: Immune monitoring in mesothelioma patients identifies novel immune-modulatory functions of gemcitabine associating with clinical response
Source: PubMed Central journal article supplement — eBioMedicine. 2021 Jan 27;64:103160. doi: 10.1016/j.ebiom.2020.103160 (PMC7910686; doi:10.1016/j.ebiom.2020.103160), 2021-01-27
Supplement: mmc10.pdf [file mmc10.pdf]

# Dammeijer & de Gooijer et al. - Table S1

|                                                                                                                    |                   | Immune monitoring subgroup |               |                 | Total cohort NVALT19 study |               |
|--------------------------------------------------------------------------------------------------------------------|-------------------|----------------------------|---------------|-----------------|----------------------------|---------------|
|                                                                                                                    |                   | Gemcitabine<br>(n=27)      | BSC<br>(n=19) | Total<br>(n=46) | Gemcitabine<br>(n=65)      | BSC<br>(n=65) |
|                                                                                                                    |                   | Number, %                  | Number, %     | Number          | Number, %                  | Number, %     |
| <b>Sex</b>                                                                                                         |                   |                            |               |                 |                            |               |
|                                                                                                                    | Female            | 3 (11)                     | 4 (21)        | 39              | 7 (11)                     | 11 (17)       |
|                                                                                                                    | Male              | 24 (89)                    | 15 (79)       | 7               | 58 (89)                    | 54 (83)       |
| <b>Age</b>                                                                                                         |                   |                            |               |                 |                            |               |
|                                                                                                                    | Median (years)    | 68                         | 70            | 68              | 69                         | 69            |
|                                                                                                                    | Range             | 43-79                      | 57-80         | 43-80           | 43-84                      | 35-82         |
| <b>WHO performance score</b>                                                                                       |                   |                            |               |                 |                            |               |
|                                                                                                                    | 0                 | 16 (59)                    | 10 (53)       | 26 (57)         | 37 (57)                    | 38 (58)       |
|                                                                                                                    | 1                 | 11 (41)                    | 8 (42)        | 19 (41)         | 27 (42)                    | 25 (38)       |
|                                                                                                                    | 2                 | 0                          | 1 (5)         | 1               | 0                          | 2 (3)         |
| <b>Histological subtype</b>                                                                                        |                   |                            |               |                 |                            |               |
|                                                                                                                    | Epithelial        | 24 (89)                    | 17 (89)       | 41 (89)         | 57 (88)                    | 57 (88)*      |
|                                                                                                                    | Biphasic          | 3 (11)                     | 2 (11)        | 5 (11)          | 5 (8)                      | 6 (9)         |
|                                                                                                                    | Sarcomatoid       | 0                          | 0             | 0               | 3 (4)                      | 2 (3)         |
| <b>Best response to first-line treatment</b>                                                                       |                   |                            |               |                 |                            |               |
|                                                                                                                    | Complete response | 2 (7)                      | 0             | 2 (4)           | 2 (3)                      | 1 (2)         |
|                                                                                                                    | Partial response  | 6 (22)                     | 7 (37)        | 13 (28)         | 25 (38)                    | 26 (40)       |
|                                                                                                                    | Stable disease    | 19 (70)                    | 12 (63)       | 31 (67)         | 38 (58)                    | 38 (58)       |
| <b>Tumor stage</b>                                                                                                 |                   |                            |               |                 |                            |               |
|                                                                                                                    | Stages I-II       | 14 (52)                    | 11 (58)       | 25 (54)         | 31 (48)                    | 30 (46)       |
|                                                                                                                    | Stages III-IV     | 9 (33)                     | 27 (42%)      | 12 (26)         | 25 (39)                    | 27 (42)       |
|                                                                                                                    | Unknown           | 4 (15)                     | 5 (26)        | 9 (20)          | 9 (14)                     | 8 (12)        |
| WHO; World Health Organization. *While on study, the diagnosis of one patient was changed into another malignancy. |                   |                            |               |                 |                            |               |
