# Supplementary figures and images for: Immune monitoring in mesothelioma patients identifies novel immune-modulatory functions of gemcitabine associating with clinical response
Source: PubMed Central journal article supplement — eBioMedicine. 2021 Jan 27;64:103160. doi: 10.1016/j.ebiom.2020.103160 (PMC7910686; doi:10.1016/j.ebiom.2020.103160), 2021-01-27

**a**

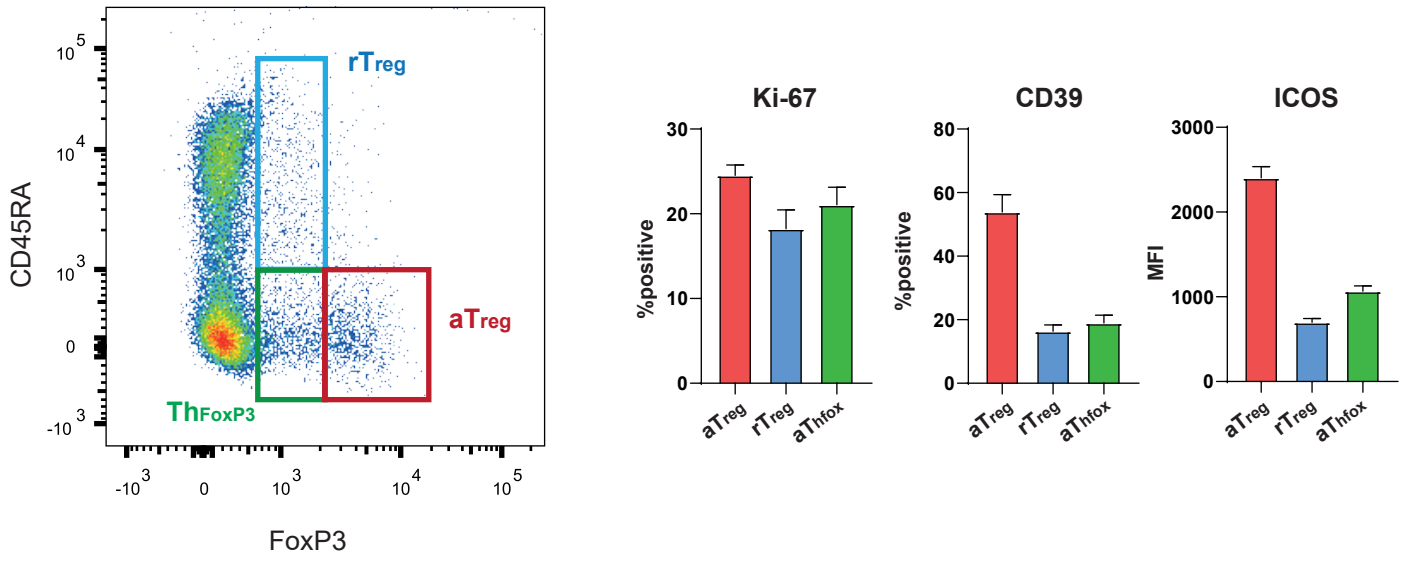

**b**

**Proliferation (Ki-67)**

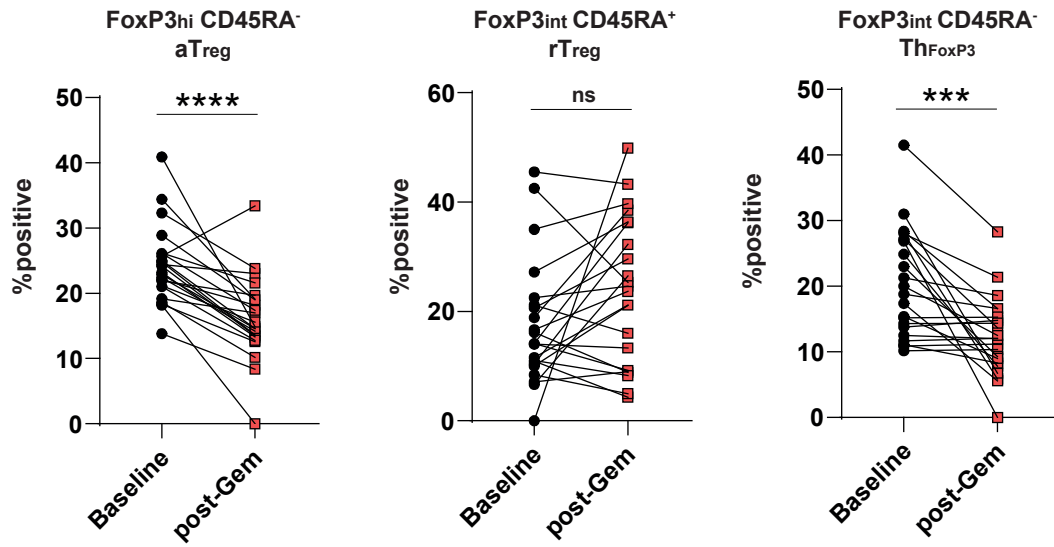

Supplement: mmc1.pdf [file mmc1.pdf]

Dammeijer & de Gooijer et al. - Table S2

**a**

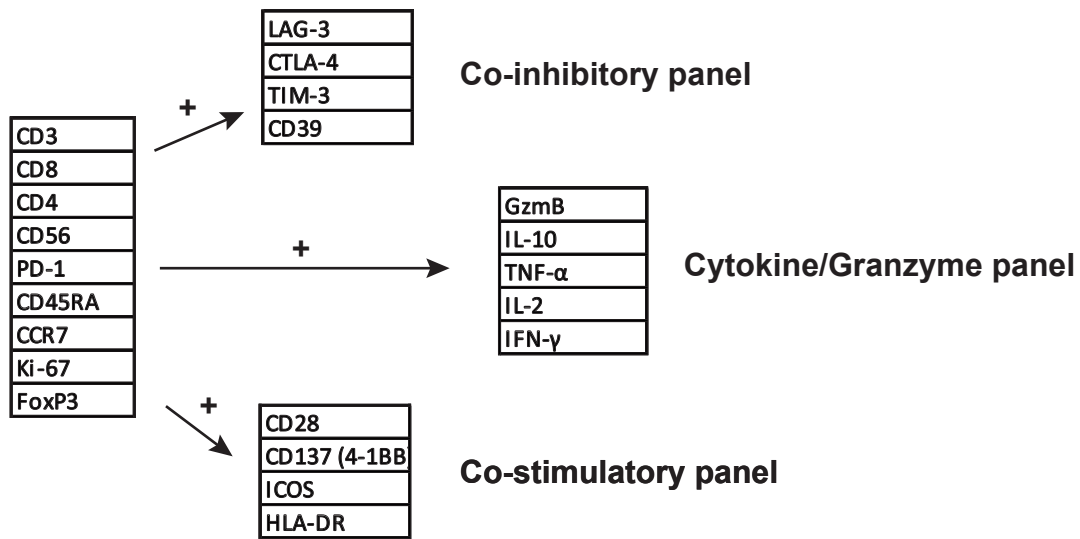

**b**

**Myeloid panel**

|          |
|----------|
| Lineage* |
| CD14     |
| CD15     |
| CD16     |
| CD11b    |
| CD33     |
| CD11c    |
| CD123    |
| PD-L1    |
| HLA-DR   |

\*

|      |
|------|
| CD3  |
| CD19 |
| CD56 |

Supplement: mmc11.pdf [file mmc11.pdf]

Dammeijer & de Gooijer et al. - Figure S2

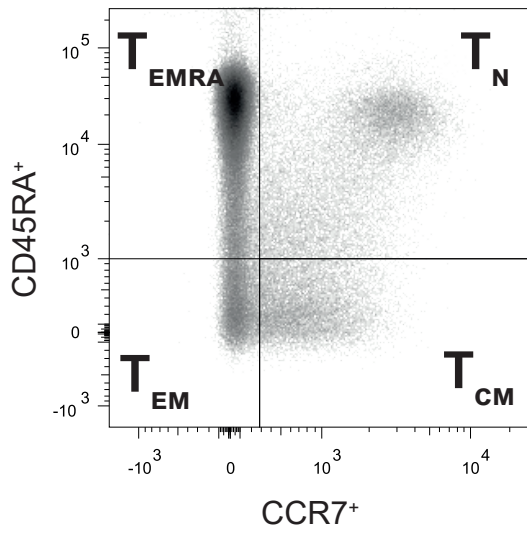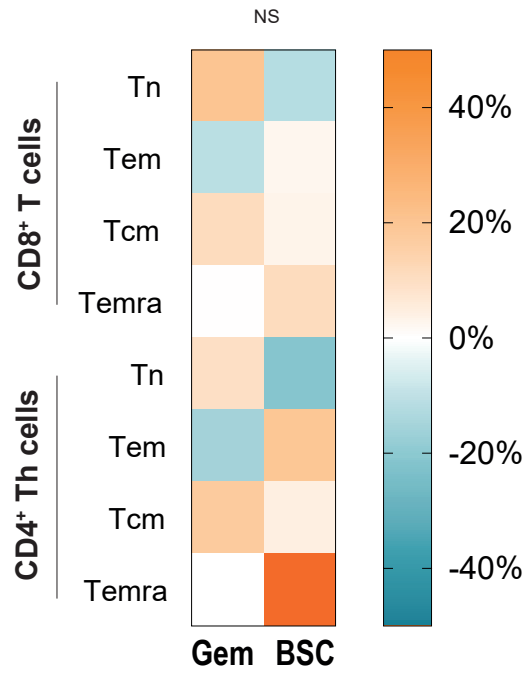

Supplement: mmc2.pdf [file mmc2.pdf]

**a**

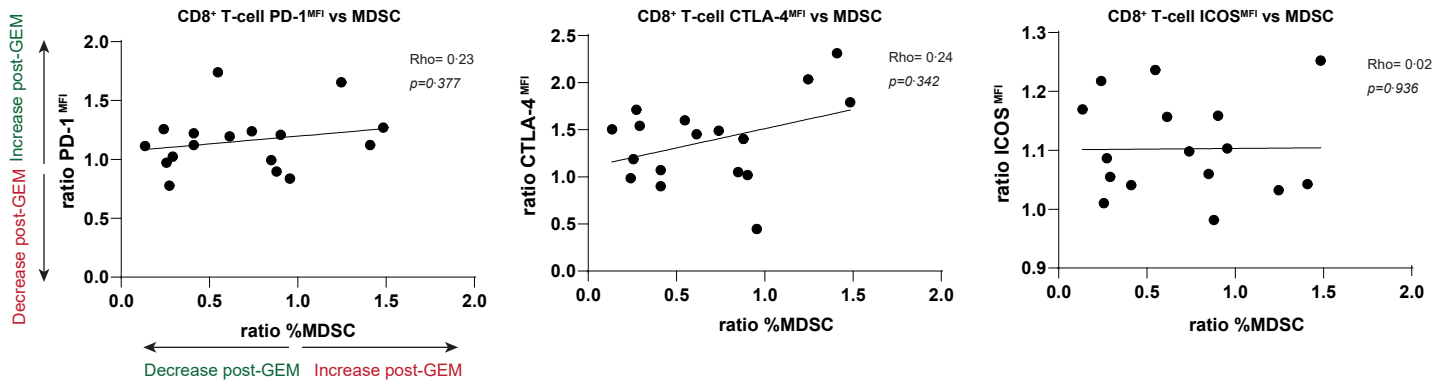

**b**

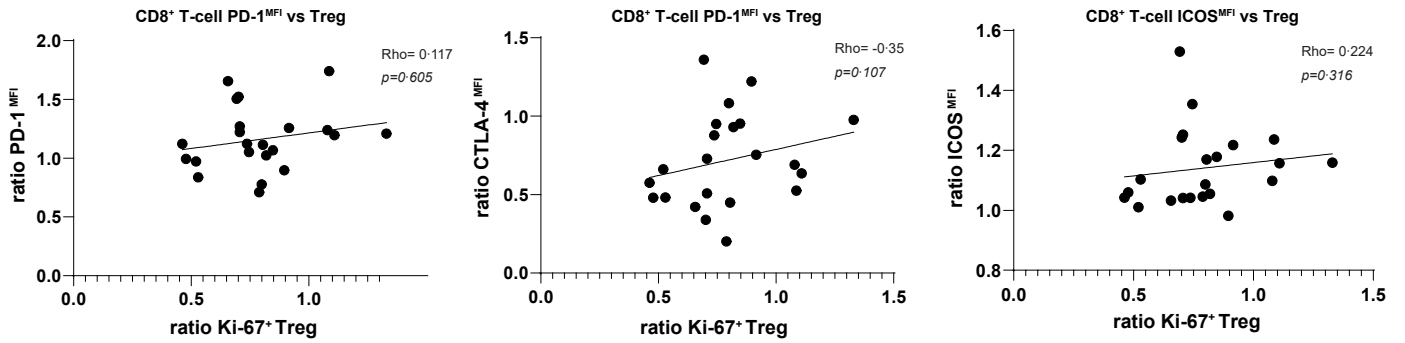

Supplement: mmc5.pdf [file mmc5.pdf]

**a**

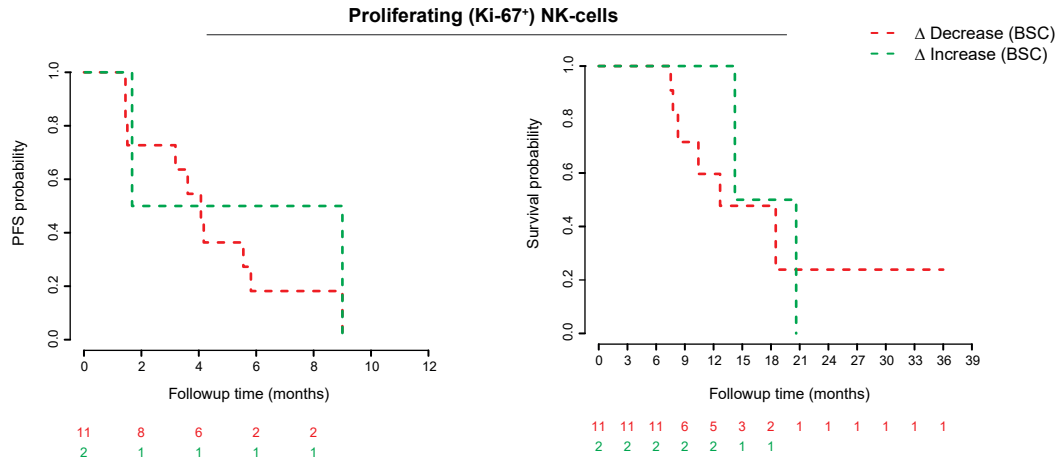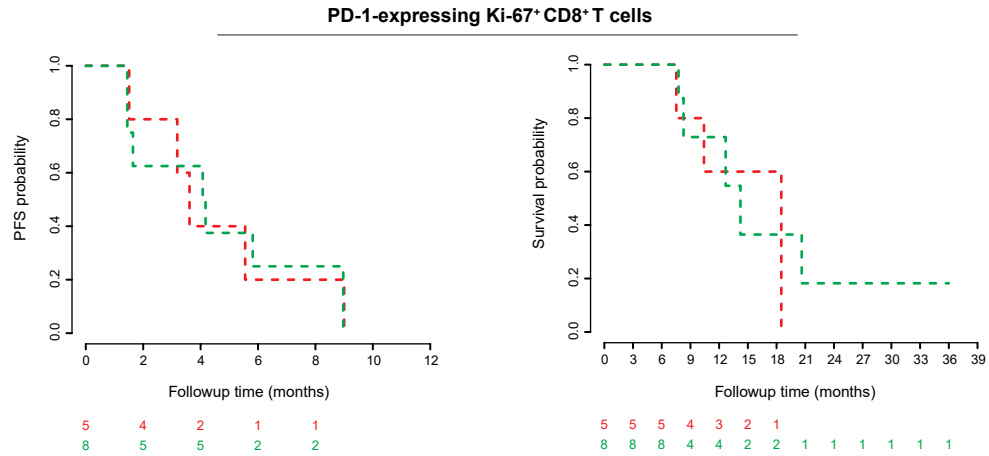

**ICOS-expressing CD8<sup>+</sup> T cells**

**b**

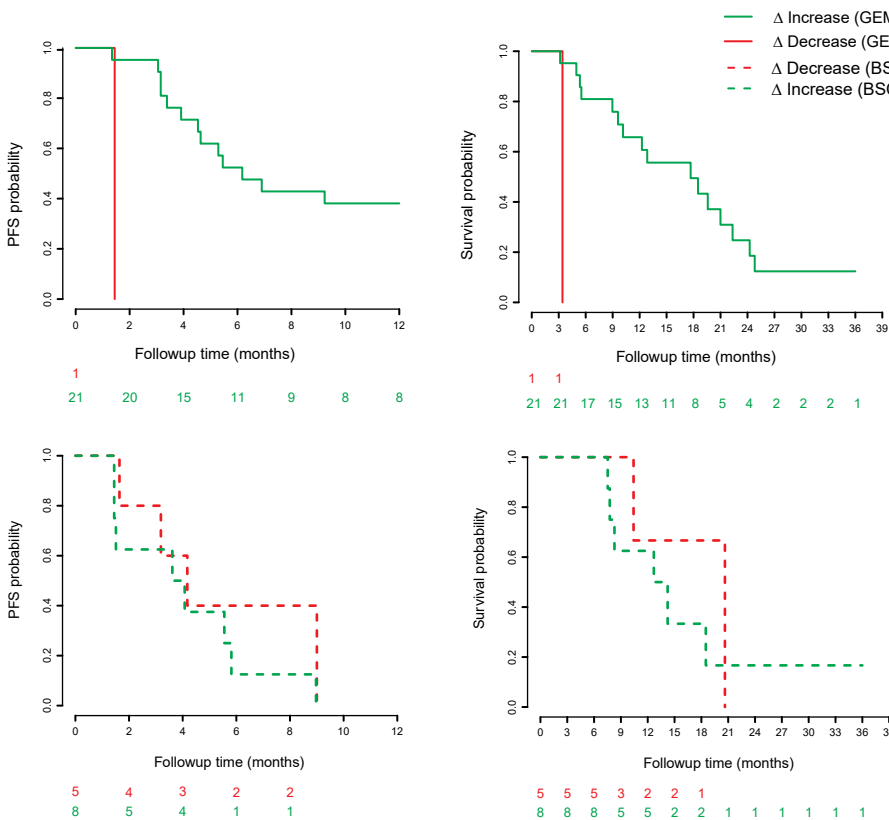

**c**

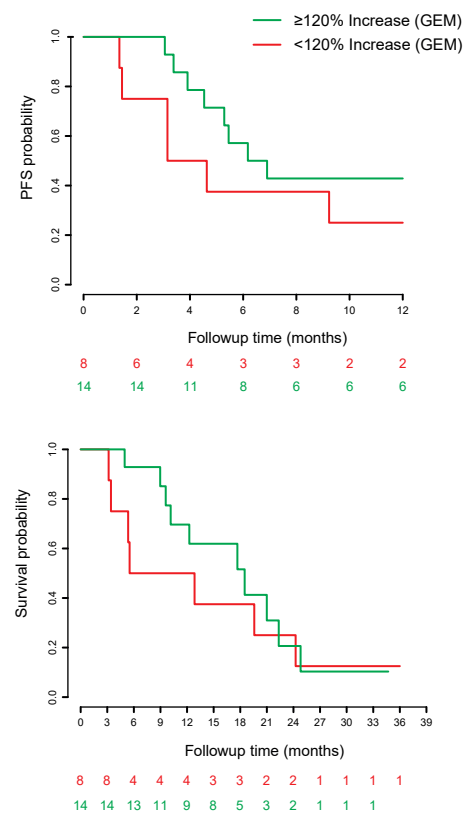

Supplement: mmc7.pdf [file mmc7.pdf]

Dammeijer & de Gooijer et al. - Figure S9

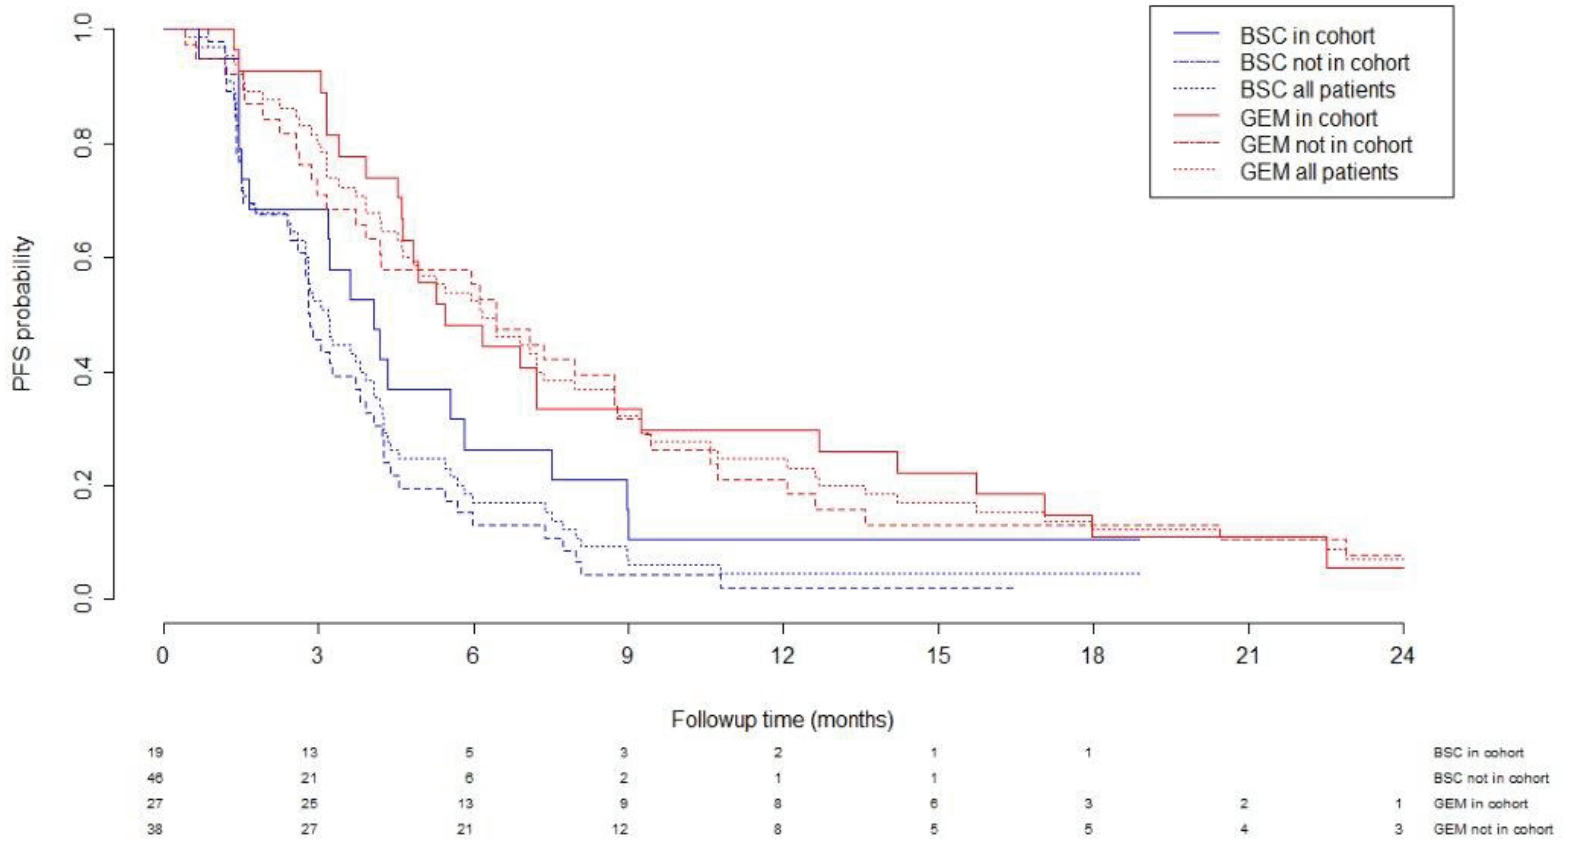

Supplement: mmc9.pdf [file mmc9.pdf]
